# Supplementary material for: Prevention of Fine Dust-Induced Vascular Senescence by Humulus lupulus Extract and Its Major Bioactive Compounds
Source: PubMed Central journal article supplement (PMC7762380; doi:10.3390/antiox9121243), 2020-12-07
Supplement: antioxidants-09-01243-s001.pdf [file antioxidants-09-01243-s001.pdf]

Supplementary Information

# Prevention of Fine Dust–Induced Vascular Senescence by *Humulus lupulus* Extract and Its Major Bioactive Compounds

Saugat Shiwakoti <sup>1</sup>, Deepak Adhikari <sup>1</sup>, Jeong Pyo Lee <sup>1</sup>, Ki-Woon Kang <sup>2</sup>, Ik-Soo Lee <sup>3</sup>, Hyun Jung Kim <sup>1,\*</sup> and Min-Ho Oak<sup>1,\*</sup>

<sup>1</sup> College of Pharmacy, Mokpo National University, Jeonnam 58554, Korea

<sup>2</sup> Division of Cardiology, Eulji University Hospital, Eulji University School of Medicine, Daejeon, 34824, Republic of Korea

<sup>3</sup> College of Pharmacy, Chonnam National University, Gwangju 61186, Korea

\* Correspondence: mhoak@mokpo.ac.kr; Tel.: +82-61-450-2681 (M.-H.O.) and hyunkim@mokpo.ac.kr; Tel.: +82-61-450-2686 (H.J.K.)

**Figure S1. Spectral data for hop prenylated flavonoids isoxanthohumol (IX) and xanthohumol (XN).**

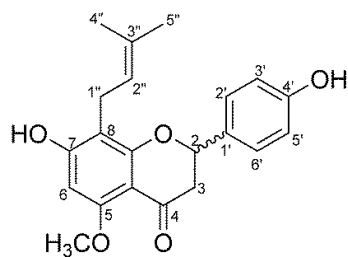

isoxanthohumol (IX)

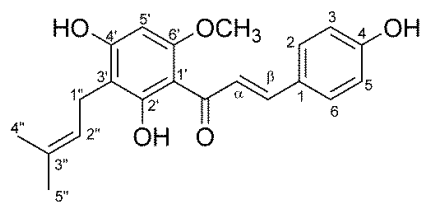

xanthohumol (XN)

**Figure S1.** Spectral data for hop prenylated flavonoids isoxanthohumol (IX) and xanthohumol (XN).

The  $^1\text{H}$  and  $^{13}\text{C}$  nuclear magnetic resonance (NMR) data of IX and XN were carried out on a JEOL ECZ-500R F (ouirier transform-nuclear magnetic resonance spectrometer (JEOL, Tokyo, Japan). Liquid chromatography–mass spectrometry (LC–MS) data were obtained by a by Agilent 6120 quadruple mass spectrometry (MS) system coupled to Agilent 1260 Infinity liquid chromatography (LC) (Agilent Technologies, Santa Clara, CA, USA) at positive and negative electrospray ionization (ESI) mode.

**Isoxanthohumol (IX)**,  $^1\text{H}$  NMR ( $\text{CD}_3\text{OD}$ , 500 MHz) :  $\delta$  7.28 (2H, d,  $J = 8.5$  Hz, H-2',6'), 6.79 (2H, d,  $J = 8.5$  Hz, H-3',5'), 6.09 (1H, s, H-6), 5.25 (1H, dd,  $J = 12.5, 3.0$  Hz, H-2), 5.11 (1H, brt,  $J = 6.8$  Hz, H-2''), 3.77 (3H, s, 5-OCH<sub>3</sub>), 3.18 (2H, m, H-1''), 2.95 (1H, dd,  $J = 16.5, 13.0$  Hz, H-3a), 2.63 (1H, dd,  $J = 16.5, 3.0$  Hz, H-3b), 1.59 (3H, s, H-5''), 1.53 (3H, s, H-4'').  $^{13}\text{C}$  NMR ( $\text{CD}_3\text{OD}$ , 125 MHz)  $\delta$  191.6 (C-4), 162.9 (C-8a) 162.5 (C-7), 160.5 (C-5), 157.5 (C-4'), 130.3 (C-3''), 130.2 (C-1'), 127.5 (C-2',6'), 122.6 (C-2''), 114.9 (C-3',5'), 108.6 (C-8), 104.5 (C-4a), 92.1 (C-6), 78.7 (C-2), 54.6 (5-OCH<sub>3</sub>), 44.9 (C-3), 24.6 (C-5''), 21.4 (C-1''), 16.6 (C-4''). ESIMS  $m/z$  355.1 [ $\text{M} + \text{H}$ ]<sup>+</sup> (calcd. for C<sub>21</sub>H<sub>23</sub>O<sub>5</sub>).

**Xanthohumol (XN)**,  $^1\text{H}$  NMR ( $\text{CD}_3\text{OD}$ , 500 MHz) :  $\delta$  7.77 (1H, d,  $J = 15.5$  Hz, H- $\alpha$ ), 7.64 (1H, d,  $J = 15.5$  Hz, H-  $\beta$ ), 7.47 (2H, d,  $J = 8.5$  Hz, H-2,6), 6.80 (2H, d,  $J = 8.5$  Hz, H-3,5) 6.00 (1H, s, H-5'), 5.17 (1H, brt,  $J = 7.0$  Hz, H-2''), 3.88 (3H, s, 6'-OCH<sub>3</sub>), 3.20 (2H,  $J = 7.0$  Hz, H-1''), 1.74 (3H, s, H-5''), 1.63 (3H, s, H-4'').  $^{13}\text{C}$  NMR ( $\text{CD}_3\text{OD}$ , 125 MHz)  $\delta$  192.7 (C-4), 164.8 (C-2') 162.4 (C-4'), 161.1 (C-6'), 159.7 (C-4), 142.0 (C- $\beta$ ), 130.2 (C-3''), 129.9 (C-2,6), 127.1 (C-1), 124.5 (C- $\alpha$ ), 122.9 (C-2''), 115.5 (C-3,5), 108.0 (C-3'), 105.2 (C-1'), 90.3 (C-5'), 54.6 (6'-OCH<sub>3</sub>), 24.6 (C-5''), 20.9 (C-1''), 16.5 (C-4''). ESIMS  $m/z$  355.2 [ $\text{M} + \text{H}$ ]<sup>+</sup> (calcd. for C<sub>21</sub>H<sub>23</sub>O<sub>5</sub>).
